# Supplementary material
Source: PubMed Central journal article supplement (PMC9972238)
Supplement: jamaneurol-e230010-s002.pdf [file jamaneurol-e230010-s002.pdf]

## Data Sharing Statement

Monreal. Association of Serum Neurofilament Light Chain Levels at Disease Onset With Disability Worsening in Patients With a First Demyelinating Multiple Sclerosis Event Not Treated With High-Efficacy Drugs. *JAMA Neurol*. Published February 27, 2023.  
doi:10.1001/jamaneurol.2023.0010

### Data

**Data available:** No
